## Inhalt / Contents

|                   |      |
|-------------------|------|
| Vorwort . . . . . | V    |
| Preface . . . . . | VIII |

### I. Allgemeines / General

|                                                                                                                                                                                                                                                                                     |     |
|-------------------------------------------------------------------------------------------------------------------------------------------------------------------------------------------------------------------------------------------------------------------------------------|-----|
| 1. <i>Reinhard Köhler</i> , Gegenstand und Arbeitsweise der Quantitativen Linguistik (Aims and methods of Quantitative Linguistics) . . . . .                                                                                                                                       | 1   |
| 2. <i>Dieter Aichele</i> , Quantitative Linguistik in Deutschland und Österreich (Quantitative Linguistics in Germany and Austria) . . . . .                                                                                                                                        | 16  |
| 3. <i>Peter Grzybek / Emmerich Kelih</i> , Zur Vorgeschichte quantitativer Ansätze in der russischen Sprach- und Literaturwissenschaft (The pre-history of quantitative methods in Russian linguistics and philology) . . . . .                                                     | 23  |
| 4. <i>Emmerich Kelih / Peter Grzybek</i> , Neuanfang und Etablierung quantitativer Verfahren in der sowjetischen Sprach- und Literaturwissenschaft (1956–1962) (Recommencement and establishment of quantitative methods in Soviet linguistics and philology (1956–1962)) . . . . . | 65  |
| 5. <i>Masamitsu Ito</i> , Quantitative linguistics in Japan (Quantitative Linguistik in Japan) . . . . .                                                                                                                                                                            | 82  |
| 6. <i>Cornelia Schindelin</i> , Zur Geschichte quantitativ-linguistischer Forschungen in China (The history of quantitative-linguistic research in China) . . . . .                                                                                                                 | 96  |
| 7. <i>Jadwiga Sambor / Adam Pawłowski</i> , Quantitative linguistics in Poland (Quantitative Linguistik in Polen) . . . . .                                                                                                                                                         | 115 |
| 8. <i>Ludmila Uhlířová</i> , Quantitative linguistics in the Czech Republic (Quantitative Linguistik in Tschechien) . . . . .                                                                                                                                                       | 129 |
| 9. <i>George K. Mikros</i> , Quantitative linguistics in Greece (Quantitative Linguistik in Griechenland) . . . . .                                                                                                                                                                 | 136 |
| 10. <i>Claudia Prün</i> , Das Werk von G. K. Zipf (The work of G. K. Zipf) . . . . .                                                                                                                                                                                                | 142 |
| 11. <i>Dieter Aichele</i> , Das Werk von W. Fucks (The work of W. Fucks) . . . . .                                                                                                                                                                                                  | 152 |
| 11a. <i>Gordana Antić / Peter Grzybek / Ernst Stadlober</i> , Mathematical aspects and modifications of Fucks' Generalized Poisson Distribution (GPD) (Mathematische Aspekte und Modifikationen von Fucks' verallgemeinerter Poisson-Verteilung) . . . . .                          | 158 |

### II. Gebiete und Phänomene: Phonologie / Fields and phenomena: phonology

|                                                                                                 |     |
|-------------------------------------------------------------------------------------------------|-----|
| 12. <i>Werner Lehfeldt</i> , Phonemdistribution (Phoneme distribution) . . . . .                | 181 |
| 13. <i>Gabriel Altmann</i> , Phonic word structure (Die Lautstruktur des Worts) . . . . .       | 191 |
| 14. <i>Karl Heinz Best</i> , Längen rhythmischer Einheiten (Length of rhythmic units) . . . . . | 208 |
| 15. <i>Sabine Weber</i> , Zusammenhänge (Interrelations) . . . . .                              | 214 |

|      |                                                                                                                                                                                               |     |
|------|-----------------------------------------------------------------------------------------------------------------------------------------------------------------------------------------------|-----|
| III. | <b>Gebiete und Phänomene: Morphologie /<br/>Fields and phenomena: morphology</b>                                                                                                              |     |
| 16.  | <i>Claudia Prün / Petra Steiner</i> , Quantitative Morphologie: Eigenschaften der morphologischen Einheiten und Systeme (Quantitative Morphologie: Properties of units and systems) . . . . . | 227 |
| 17.  | <i>R. Harald Baayen</i> , Morphological productivity (Morphologische Produktivität) . . . . .                                                                                                 | 243 |
| 18.  | <i>Karl-Heinz Best</i> , Morphemlänge (Morph length) . . . . .                                                                                                                                | 255 |
| 19.  | <i>Karl-Heinz Best</i> , Wortlänge (Word length) . . . . .                                                                                                                                    | 260 |
| IV.  | <b>Gebiete und Phänomene: Syntax /<br/>Fields and phenomena: syntax</b>                                                                                                                       |     |
| 20.  | <i>Relja Vulanović / Reinhard Köhler</i> , Syntactic units and structures (Syntaktische Einheiten und Strukturen) . . . . .                                                                   | 274 |
| 21.  | <i>Sven Naumann</i> , Probabilistic grammar (Probabilistische Grammatik) . . . . .                                                                                                            | 292 |
| 22.  | <i>Karl-Heinz Best</i> , Satzlänge (Sentence length) . . . . .                                                                                                                                | 298 |
| V.   | <b>Gebiete und Phänomene: Lexik /<br/>Fields and phenomena: lexicology and lexicography</b>                                                                                                   |     |
| 23.  | <i>Reinhard Köhler</i> , Properties of lexical units and systems (Eigenschaften lexikalischer Einheiten und Systeme) . . . . .                                                                | 305 |
| 24.  | <i>Pavel M. Alekseev</i> , Frequency dictionaries (Häufigkeitswörterbücher) . . . . .                                                                                                         | 312 |
| VI.  | <b>Gebiete und Phänomene: Text / Fields and phenomena: text</b>                                                                                                                               |     |
| 25.  | <i>Alexander Mehler</i> , Eigenschaften der textuellen Einheiten und Systeme (Properties of textual units and systems) . . . . .                                                              | 325 |
| 26.  | <i>Luděk Hřebíček</i> , Text laws (Textgesetze) . . . . .                                                                                                                                     | 348 |
| 27.  | <i>Gejza Wimmer</i> , The type-token relation (Das Type-Token-Verhältnis) . . . . .                                                                                                           | 361 |
| 28.  | <i>Juhan Tuldava †</i> , Stylistics, author identification (Stilistik und Autorenbestimmung) . . . . .                                                                                        | 368 |
| 29.  | <i>Fiona J. Tweedie</i> , Statistical models in stylistics and forensic linguistics (Statistische Modelle in der Stilistik und in der forensischen Linguistik) . . . . .                      | 387 |
| 30.  | <i>R. Harald Baayen</i> , Word frequency distributions (Verteilungen der Worthäufigkeit) . . . . .                                                                                            | 397 |
| VII. | <b>Gebiete und Phänomene: Semantik und Pragmatik /<br/>Fields and phenomena: semantics and pragmatics</b>                                                                                     |     |
| 31.  | <i>Wolfgang Wildgen</i> , Catastrophe theoretical models in semantics (Katastrophentheoretische Modelle in der Semantik) . . . . .                                                            | 410 |
| 32.  | <i>Arne Ziegler</i> , Denotative Textanalyse (Denotative text analysis) . . . . .                                                                                                             | 423 |
| 33.  | <i>Jadwiga Sambor</i> , Lexical networks (Lexikalische Netze) . . . . .                                                                                                                       | 447 |
| 34.  | <i>Victor Levickij</i> , Polysemie (Polysemy) . . . . .                                                                                                                                       | 458 |
| 35.  | <i>Victor Levickij</i> , Lexikalische Kombinierbarkeit (Lexical combinability) . . . . .                                                                                                      | 464 |
| 36.  | <i>John Myhill</i> , Quantitative methods of discourse analysis (Quantitative Methoden der Diskursanalyse) . . . . .                                                                          | 471 |

VIII. Gebiete und Phänomene: Geolinguistik und Dialektologie/  
Fields and phenomena: geolinguistics and dialectology

37. *Hans Goebel*, Dialektometrie (Dialectometry) . . . . . 498  
 38. *Edgar Haimmerl*, Taxierungsalgorithmen (Appraisal algorithms) . . . . . 532  
 39. *Eric S. Wheeler*, Multidimensional scaling for linguistics  
 (Multidimensionale Skalierung) . . . . . 548

IX. Gebiete und Phänomene: Typologie/  
Fields and phenomena: typology

40. *Michael Cysouw*, Quantitative methods in typology (Quantitative  
Methoden in der Typologie) . . . . . 554  
 41. *Christiane Hoffmann*, Morphologisch orientierte Typologie  
(Morphology-oriented typology) . . . . . 578  
 42. *Ludmila Uhlířová*, Word order variation (Wortfolgevariation) . . . . . 598

X. Gebiete und Phänomene: Diachronie/  
Fields and phenomena: diachrony

43. *Witold Mańczak*, Diachronie: Grammatik (Diachrony: grammar) . . . . . 607  
 44. *Edda Leopold*, Das Piotrowski-Gesetz (Piotrowski's law) . . . . . 627  
 45. *Hans J. Holm*, Genealogische Verwandtschaft (Genetic relationship) . . . . . 633

XI. Modelle, Methoden, Hypothesen und Gesetze/  
Models, methods, hypotheses, and laws

46. *Gabriel Altmann*, Diversification processes (Diversifikationsprozesse) . . . . . 646  
 47. *Irene M. Cramer*, Das Menzerathsche Gesetz (Menzerath's law) . . . . . 659  
 48. *Wolfgang Wildgen* / *Peter Jörg Plath*, Katastrophen- und Chaostheorie in  
der linguistischen Modellbildung (Catastrophe and chaos theory in  
linguistic model building) . . . . . 688  
 49. *Royal Skousen*, Analogical modeling (Analogische Modellierung) . . . . . 705  
 50. *S. Naranan* / *V. K. Balasubrahmanyam*, Power laws in statistical linguistics  
and related systems (Potenzgesetze in der quantitativen Linguistik und in  
verwandten Systemen) . . . . . 716  
 51. *Adam Pawłowski*, Modelling of sequential structures in text (Die  
Modellierung sequenzieller Strukturen in Texten) . . . . . 738  
 52. *Georgij Sil' nitskij*, Correlational analysis in linguistics: Results and  
perspectives (Korrelationsanalyse in der Linguistik: Ergebnisse und  
Möglichkeiten) . . . . . 751  
 53. *Reinhard Köhler*, Synergetic linguistics (Synergetische Linguistik) . . . . . 760  
 54. *Thorsten Roelcke*, Sprachliche Ökonomie / Kommunikative Effizienz  
(Linguistic economy / communicative efficiency) . . . . . 775  
 55. *Gejza Wimmer* / *Gabriel Altmann*, Unified derivation of some linguistic  
laws (Die vereinheitlichte Ableitung linguistischer Gesetze) . . . . . 791

## XII. Anwendungsgebiete und Bezüge zu anderen Disziplinen / Relationships with other disciplines

56. *Hermann Ney*, The statistical approach to natural language processing (Statistische Ansätze für die Verarbeitung natürlicher Sprache) . . . . . 808
57. *Walter Daelemans*, Machine learning of natural language (Maschinelles Lernen natürlicher Sprache) . . . . . 821
58. *Yuri A. Kosarev / Andrey L. Ronzhin*, Quantitative methods in speech processing (Quantitative Verfahren bei der Verarbeitung gesprochener Sprache) . . . . . 834
59. *Sven Naumann*, Probabilistic parsing (Probabilistisches Parsing) . . . . . 847
60. *Rajmund G. Piotrowski*, Quantitative linguistics and information theory (Quantitative Linguistik und Informationstheorie) . . . . . 857
61. *V. K. Balasubrahmanyam / S. Naranan*, Entropy, information, and complexity (Entropie, Information und Komplexität) . . . . . 878
62. *Jussi Niemi / Jürgen Tesak*, Quantitative linguistics and neurolinguistics (Quantitative Linguistik und Neurolinguistik) . . . . . 891
63. *Xenia Piotrowska*, Computer-assisted language learning. The quantitative-linguistic basis of CALL methods (Computer-unterstützter Spracherwerb. Die quantitativ- linguistische Grundlage von CALL-Methoden) . . . . . 897
64. *Jaan Mikk*, Text comprehensibility (Textverständlichkeit) . . . . . 909
65. *Rajmund G. Piotrowski / Larissa N. Beliaeva*, Linguistic automaton (Der linguistische Automat) . . . . . 921
66. *Evangelos Dermatas / George Kokkinakis*, Phoneme-grapheme conversion (Phonem-Graphem-Konvertierung) . . . . . 931
67. *Kyo Kageura*, Character system, orthography and types of origin in Japanese writing (Das japanische Schriftsystem, Orthographie und Herkunftsarten) . . . . . 935
68. *Cornelia Schindelin*, Die quantitative Erforschung der chinesischen Sprache und Schrift (Quantitative research on Chinese language and script) . . . . . 947
69. *Chantal Enguehard*, Terminology (Terminologie) . . . . . 971
70. *Weronika Piotrowska*, Quantitative linguistics and psychiatry (Quantitative Linguistik und Psychiatrie) . . . . . 988

## XIII. Informationsquellen / Sources of Information

71. *Reinhard Köhler*, Sources of information (Informationsquellen) . . . . . 1003
- Namenregister / Name index . . . . . 1005
- Sachregister / Subject index . . . . . 1026
